# Supplementary material for: Performance of Artificial Intelligence Models Designed for Diagnosis, Treatment Planning and Predicting Prognosis of Orthognathic Surgery (OGS)—A Scoping Review
Source: MDPI journal article supplement (doi:10.3390/app12115581), 2022-05-31

Table S1: Structured search strategy carried out in electronic databases

| Search/Filters            | Topic and terms                                                                                                                                                                                                                                                                                         |
|---------------------------|---------------------------------------------------------------------------------------------------------------------------------------------------------------------------------------------------------------------------------------------------------------------------------------------------------|
| <b>“English” Language</b> | “artificial intelligence” OR “deep learning” OR “machine learning” OR “Supervised Machine Learning” OR “automated learning” OR “Unsupervised Machine Learning” OR “orthognathic surgeries” OR “maxillofacial surgeries”OR “plastic surgeries” OR “prediction” OR “diagnosis” OR “prognosis”             |
| <b>“English” Language</b> | “artificial intelligence” AND “deep learning” AND “machine learning” AND “Supervised Machine Learning” AND “automated learning” AND “Unsupervised Machine Learning” AND “orthognathic surgeries” AND “maxillofacial surgeries” AND “plastic surgeries” AND “prediction” AND “diagnosis” AND “prognosis” |

Table S2: Assessment of risk of bias domains and applicability concerns

[illegible]

(Kim, Y. H., et al., 2021)

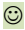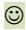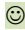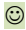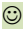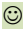

(Dot, G., et al., 2021)

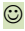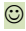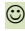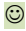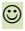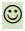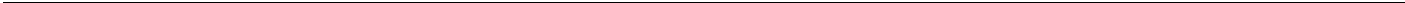

Supplement: s1 [file s1]
